# Supplementary material for: Inserting auxeticity into graphene oxide via bottom-up strategy
Source: Royal Society of Chemistry journal article supplement (doi:10.1039/d3nr04849g), 2024-01-01
Supplement: d3nr04849g1.pdf [file d3nr04849g1.pdf]

## Supplementary information

### Inserting the Auxeticity into Graphene Oxide via the Bottom-up Strategy

Cong Sun<sup>a</sup>, Zeyan Wang<sup>a</sup>, Nana Tian<sup>a</sup>, Mingqing Liao<sup>d</sup>, Conglin Zhang<sup>c</sup>, Qingfeng Guan<sup>a</sup>, Erjun Kan<sup>b,\*</sup>, Jintong Guan<sup>a,\*</sup>

<sup>a</sup> *School of Materials Science and Engineering, Jiangsu University, Zhenjiang, 212013, P. R. China*

<sup>b</sup> *Department of Applied Physics and Institution of Energy and Microstructure, Nanjing University of Science and Technology, Nanjing, Jiangsu 210094, P. R. China*

<sup>c</sup> *School of Material Science and Engineering, Yancheng Institute of Technology, Yancheng, 224051, P. R. China*

<sup>d</sup> *School of Materials Science and Engineering, Jiangsu University of Science and Technology, Zhenjiang 212003, China*

## Section I: the properties of SL-C<sub>2</sub>O

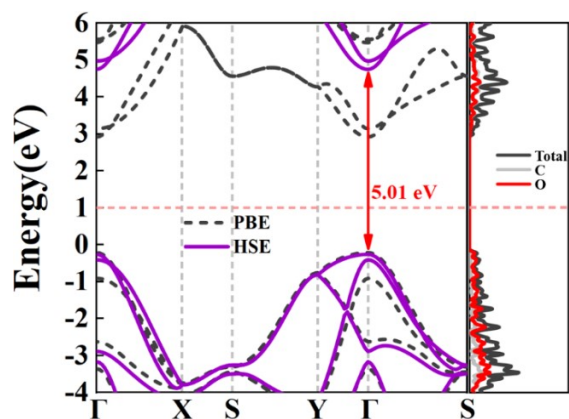

Fig. S1 The electronic structure of SL-C<sub>2</sub>O.

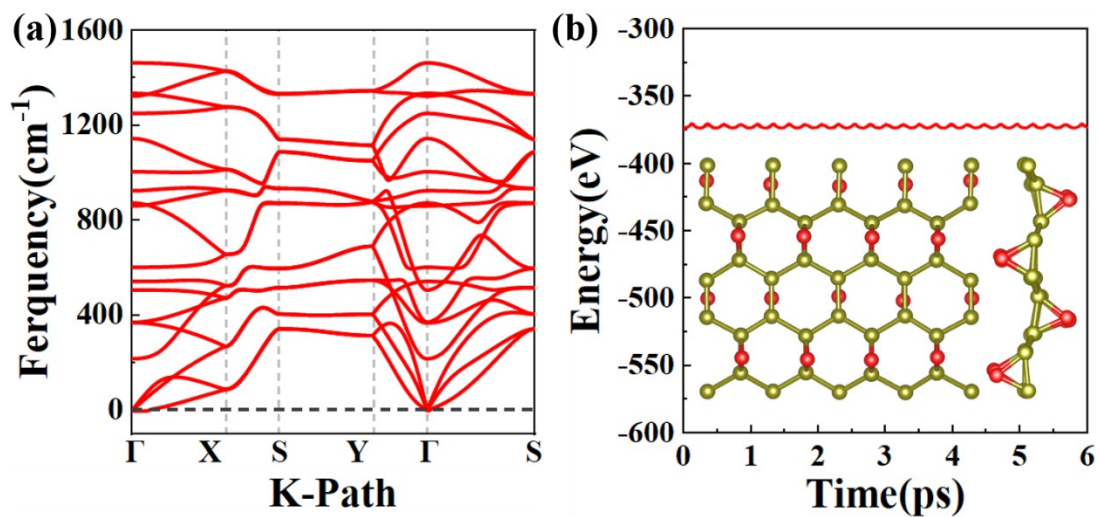

Fig. S2 The confirmation of stability of SL-C<sub>2</sub>O. (a) the phonon dispersion curves and (b) The snapshots of ab initio molecular dynamics (AIMD) simulations at 300 K in 6ps.

## Section II: the details of the four proposed stacking modes

The four staking modes is explained as below:

As shown in Fig. S3,  $\alpha$ - is commonly known as the AA stacking, where all the atoms in two layers have same lateral coordinates. For  $\beta$ - phase, there is a relatively shift along the x-direction, where the hollow site (namely site 1) coordinates to the oxidized bridge site (namely site 2). For  $\gamma$ - phase, there is a bidirectional shift along both directions, where the oxidized bridge site (namely site 2) coordinates to the unoxidized bridge site (namely site 4). For  $\delta$ - phase, the relatively shift is along the y-direction, where the oxidized bridge site (namely site 2) coordinates to the oxidized carbon atom (namely site 3).

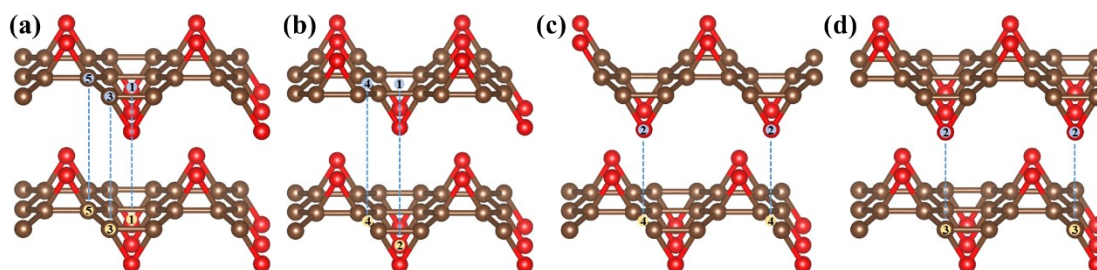

Fig. S3 The stacking modes of layer-stacking  $C_2O$ -based materials: (a)  $\alpha$ -, (b)  $\beta$ -, (c)  $\gamma$ -, (d)  $\delta$ -.

### Section III: the dynamic stability of proposed C<sub>2</sub>O-based

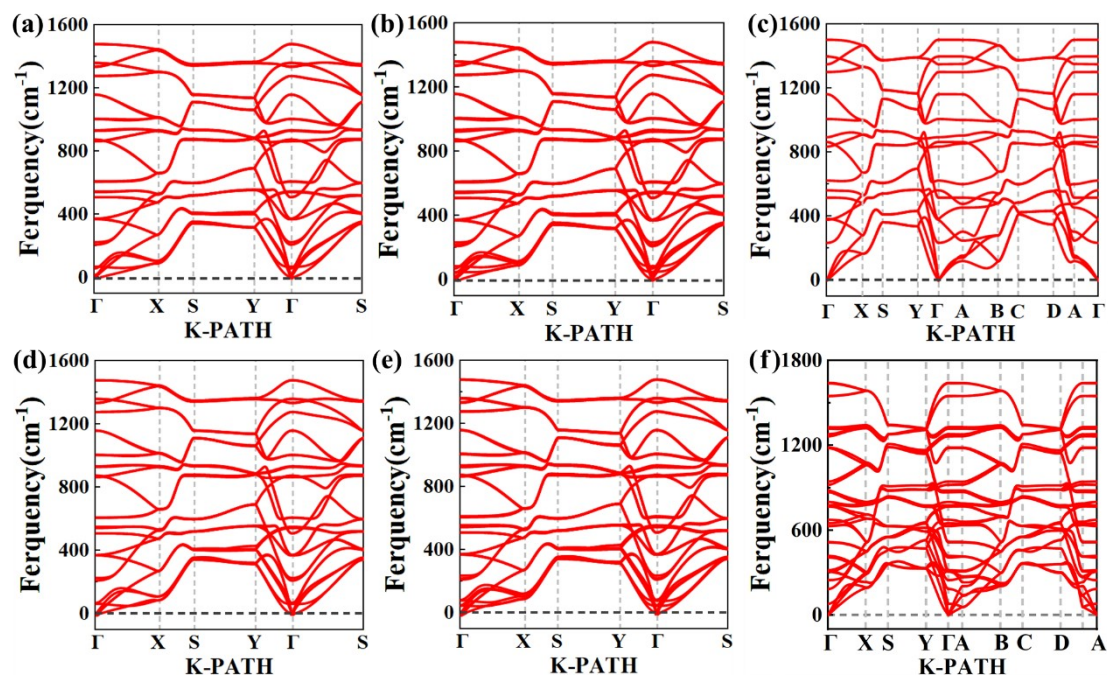

Fig. S4 Calculated phonon spectrum for (a)  $\alpha$ -BL, (b)  $\alpha$ -TL, (c)  $\alpha$ -BK, (d)  $\beta$ -BL, (e)  $\beta$ -TL and (f)  $\beta$ -BK-C<sub>2</sub>O, where imaginary part in z direction could be neglected.

## Section IV: the basic properties of proposed C<sub>2</sub>O-based materials

Table. S1 The calculated lattice parameters ( $a$  and  $b$ ), the distance between layers ( $d$ ) and the bandgap ( $E_{\text{PBE}}$  and  $E_{\text{HSE}}$ ) of the layer C<sub>2</sub>O-based materials.

|              | $a(\text{\AA})$ | $b(\text{\AA})$ | $d(\text{\AA})$ | $E_{\text{PBE}}(\text{eV})$ | $E_{\text{HSE}}(\text{eV})$ |
|--------------|-----------------|-----------------|-----------------|-----------------------------|-----------------------------|
| SL           | 2.58            | 4.43            | -               | 3.14                        | 5.01                        |
| $\alpha$ -BL | 2.58            | 4.44            | 1.56            | 2.97                        | 4.86                        |
| $\alpha$ -TL | 2.58            | 4.44            | 1.55            | 2.90                        | 4.77                        |
| $\alpha$ -BK | 2.56            | 4.44            | 1.00            | 2.78                        | 4.49                        |
| $\beta$ -BL  | 2.58            | 4.44            | 1.65            | 2.98                        | 4.86                        |
| $\beta$ -TL  | 2.58            | 4.44            | 1.64            | 2.92                        | 4.80                        |
| $\beta$ -BK  | 2.58            | 4.45            | 1.01            | 1.67                        | 2.83                        |

Table. S2 Predicted Elastic Constants  $C_{ij}$  (GPa), Bulk Moduli  $B$  (GPa), Shear Moduli  $G$  (GPa), Young's Moduli  $E$  (GPa) and Poisson's Ratio  $\nu$  of mentioned 2D materials.

|              | $C_{11}$ | $C_{12}$ | $C_{22}$ | $C_{66}$ | $B$    | $G$    | $E$    | $\nu$ | Ref.      |
|--------------|----------|----------|----------|----------|--------|--------|--------|-------|-----------|
| Graphene     | 367.19   | 69.623   | 367.19   | 148.78   | 218.41 | 148.78 | 353.98 | 0.19  | This work |
| Graphene     | 349      | 72       | 349      | 138      | -      | -      | 334    | 0.206 | Ref.[1]   |
| SL           | 291.71   | 23.10    | 224.51   | 98.12    | 140.61 | 107.81 | 289.34 | 0.079 | This work |
| $\alpha$ -BL | 582.52   | 46.55    | 455.85   | 197.56   | 282.87 | 216.94 | 577.77 | 0.080 | This work |
| $\alpha$ -TL | 873.36   | 71.01    | 688.75   | 297.34   | 426.03 | 326.18 | 866.04 | 0.080 | This work |
| $\beta$ -BL  | 581.75   | 45.73    | 451.57   | 195.36   | 281.19 | 215.41 | 577.12 | 0.079 | This work |
| $\beta$ -TL  | 872.75   | 69.10    | 679.91   | 292.79   | 422.72 | 323.19 | 865.72 | 0.079 | This work |

Table. S3 Predicted Elastic Constants  $C_{ij}$  (GPa) of Diamond,  $\alpha$ -BK and  $\beta$ -BK.

|              | C11     | C33     | C66    | C12    | C13    | Ref.      |
|--------------|---------|---------|--------|--------|--------|-----------|
| Graphite     | 1023    | 68.46   | 8.93   | 263.75 | 6.26   | This work |
| Graphite     | 1109    | 38.7    | 5      | 139    | 0      | Ref.[2]   |
| Diamond      | 1127.69 | 1127.69 | 599.56 | 161.19 | 161.19 | This work |
| Diamond      | 1076.00 | -       | 577    | 125    | -      | Ref.[3]   |
| $\alpha$ -BK | 793.93  | 358.96  | 266.04 | 73.72  | -26.09 | This work |
| $\beta$ -BK  | 900.80  | 280.79  | 150.35 | 124.57 | 42.21  | This work |

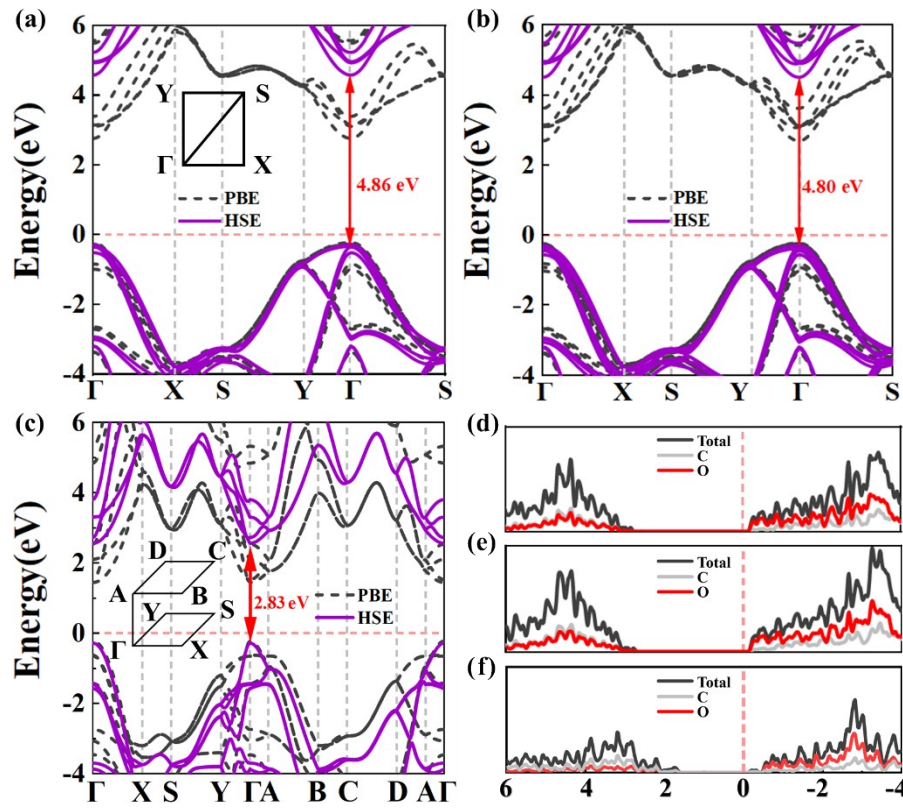

Fig. S5 Band structure of the materials in  $\beta$ -family: (a)BL; (b) TL; (c) BK- $C_2O$  and partial density of states of the materials in  $\beta$ -family: (d)BL; (e) TL; (f) BK- $C_2O$ .

## Section V: the mechanical properties of proposed C<sub>2</sub>O-based materials

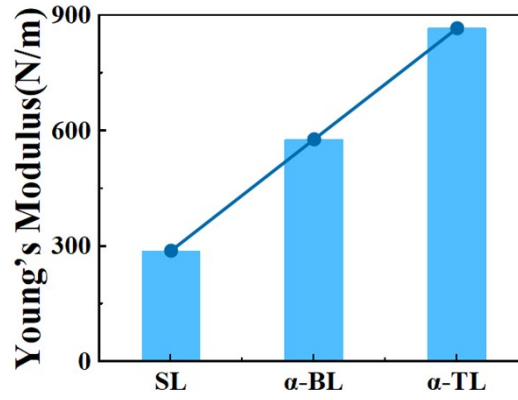

Fig. S6 Young's modulus value along the  $x$ -direction of SL-C<sub>2</sub>O,  $\alpha$ -BL-C<sub>2</sub>O and  $\alpha$ -TL-C<sub>2</sub>O which is highly linearly correlated.

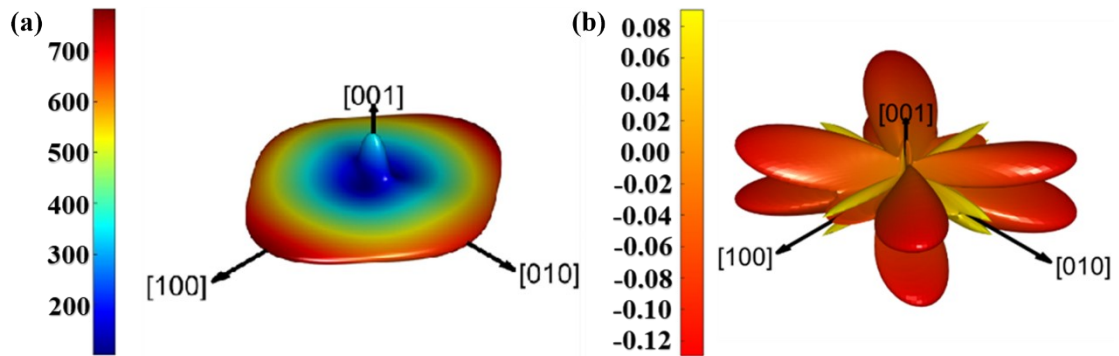

Fig. S7 The overview orientation dependent (a) Young's modulus and (b) the minimum Poisson's ratio of  $\alpha$ -BK-C<sub>2</sub>O.

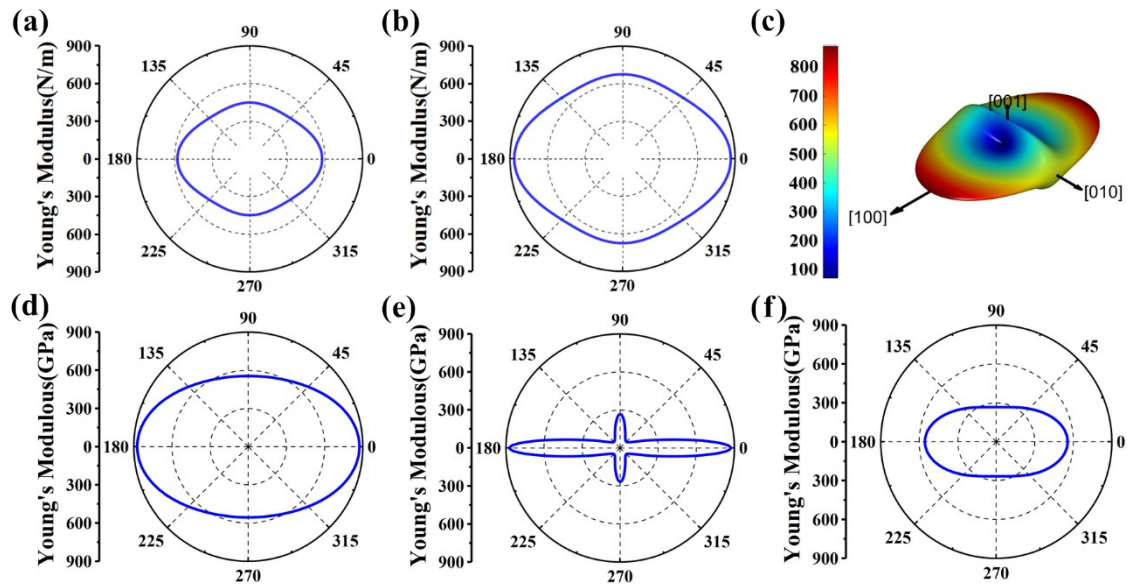

Fig. S8 Orientation dependent Young's modulus of 2D materials and  $\beta$ -BK- $C_2O$  in  $\beta$ -family: (a)  $\beta$ -BL- $C_2O$ ; (b)  $\beta$ -TL- $C_2O$ ; (c)-(f) the overview of the Young's modulus of  $\beta$ -BK- $C_2O$  and the corresponding axial direction plane (d)  $xy$ -, (e)  $xz$ - and (f)  $yz$ -plane.

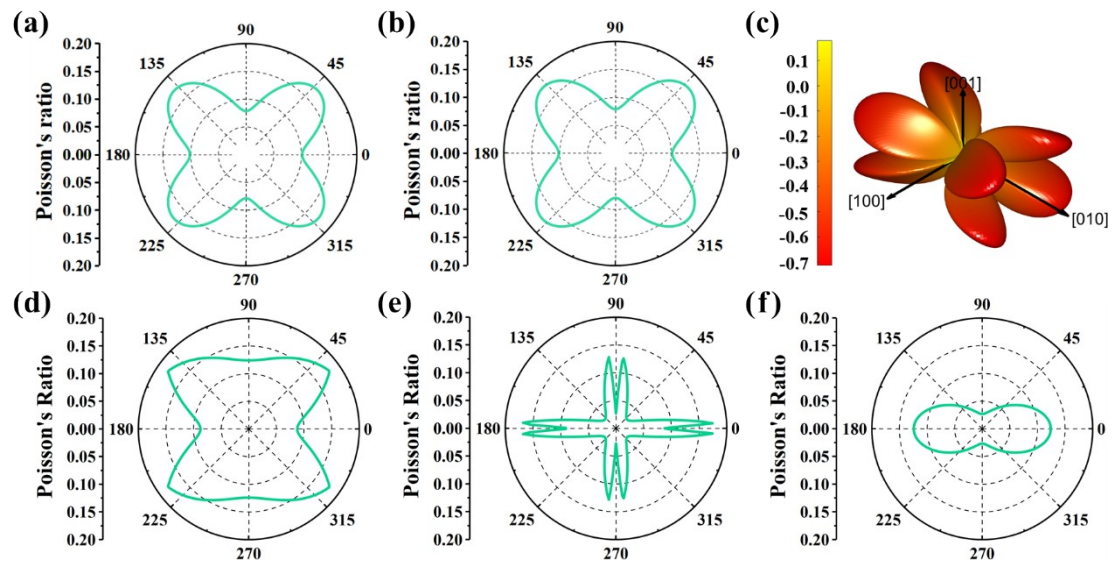

Fig. S9 Orientation dependent Poisson's ratio modulus of 2D materials and  $\beta$ -BK- $C_2O$ : (a)  $\beta$ -BL- $C_2O$ , (b)  $\beta$ -TL- $C_2O$ ; and (c)-(f) the overview of the lowest Poisson's ratio of  $\beta$ -BK- $C_2O$  and the corresponding axial directional plane (d)  $xy$ -, (e)  $xz$ - and (f)  $yz$ -plane.



## Reference

- [1] B. Wang, Q. Wu, Y. Zhang, L. Ma, J. Wang, Auxetic B<sub>4</sub>N Monolayer: A Promising 2D Material with in-Plane Negative Poisson's Ratio and Large Anisotropic Mechanics, *ACS Appl. Mater. Interfaces*. 11 (2019) 33231–33237. <https://doi.org/10.1021/acsami.9b10472>.
- [2] K.H. Michel, B. Verberck, Theory of the elastic constants of graphite and graphene, *Phys. Status Solidi Basic Res.* 245 (2008) 2177–2180. <https://doi.org/10.1002/pssb.200879604>.
- [3] M. H. Grimsditch and A. K. Ramdas, Brillouin scattering in diamond, *Physical Review B.* (1975) 3139–3148. <https://doi.org/10.1103/PhysRevB.11.3139>.
